# Supplementary material for: Notch gain of function in mouse periocular mesenchyme downregulates FoxL2 and impairs eyelid levator muscle formation, leading to congenital blepharophimosis
Source: Oxford University Press journal article supplement (doi:10.1242/jcs.085001), 2011-07-06
Supplement: jcs085001tables2.pdf [file jcs085001tables2.pdf]

**Supplement Table 2. Information for plasmids construction**

| Construct name            | Vector                      | Primer pair                                                                                               |
|---------------------------|-----------------------------|-----------------------------------------------------------------------------------------------------------|
| <i>pcDNA3.1-mFoxL2</i>    | <i>pcDNA3.1/Myc-His(-)A</i> | Forward <u>AATTGCTAGCC</u> CATGATGGCCAGCTACCCCGA<br>Reverse GCATA <u>AAGCTTT</u> CAGAGATCCAGACGCGAGTGC    |
| <i>pGL3.0-mFoxL2pr3.1</i> | <i>pGL3.0</i>               | Forward ATGAG <u>CTAGCC</u> GGCCAGAGAAACACGGAGTTCC<br>Reverse ATTAG <u>TCGAC</u> AAAAGCCGGCTCTCCGG        |
| <i>pGL4.10-mActa2</i>     | <i>pGL4.10</i>              | Forward GCCGGCTAGC <u>CACACC</u> CATAAAAACAAGTGCATGA<br>Reverse AATT <u>CTCGAGT</u> ATCCCTGGGCTGGGGCTACTT |

Note: underlined sequences in primers were restriction enzyme cutting sites
