# Supplementary material for: Notch gain of function in mouse periocular mesenchyme downregulates FoxL2 and impairs eyelid levator muscle formation, leading to congenital blepharophimosis
Source: Oxford University Press journal article supplement (doi:10.1242/jcs.085001), 2011-07-06
Supplement: jcs085001tables3.pdf [file jcs085001tables3.pdf]

**Supplement Table 3. Primer information for the ChIP assay**

| Primer name | Sequence                  | Location                                  | PCR Product (bp) |
|-------------|---------------------------|-------------------------------------------|------------------|
| RBPJ-F      | 5' AATGGTCTTCGGACCGCTGGAG | putative RBPJ binding site                | 191              |
| RBPJ-R      | 5' GGCTGAGGAAGAGTGATCAGAC | in mFoxL2 promoter                        |                  |
| RBPJ-Hes-F  | 5' CATTGGCCGCCAGACCTTGT   | known RBPJ site in mouse Hes-1            | 160              |
| RBPJ-Hes-R  | 5' ACCAGCTCCAGATCCTGTGT   | promoter (positive control)               |                  |
| RBPJ-neg-F  | 5' GACAGTACCTGCGTCTAGAA   | non-RBPJ site in mouse Hes1               | 200              |
| RBPL-neg-R  | 5' CCTTCGCCTCTTCTCCATGA   | promoter (negative control)               |                  |
| NBOX-F1     | 5' TGAGAGGCTTCTGCTCTGTC   | putative Hes-1 binding site 1             | 181              |
| NBOX-R1     | 5' CTGGCAAGGTTAAGCACCAT   | in mFoxL2 promoter                        |                  |
| NBOX-F2     | 5' TGCCAGTGAGCGGTACTCCT   | putative Hes-1 binding site 2             | 128              |
| NBOX-R2     | 5' ACCAGCTCAGAGCTCGTGTC   | in mFoxL2 promoter                        |                  |
| NBOX-F3     | 5' CTGACGCAAGCGGAActCTG   | putative Hes-1 binding site 3             | 156              |
| NBOX-R3     | 5' GTTTTCTTGGCTGAGCTCTC   | in mFoxL2 promoter                        |                  |
| NBOX-F4     | 5' CCGCAGCCTGCAGAAGTTAG   | putative Hes-1 binding site 4             | 139              |
| NBOX-R4     | 5' GGTAGCTGGCCATCATGACA   | in mFoxL2 promoter                        |                  |
| FoxL2-F1    | 5' AGGAGAGTGAGCAGGCTTCATT | putative FoxL2 binding site               | 235              |
| FoxL2-R1    | 5' AGTGAGGATTAACCGCCTGT   | in $\alpha$ -smooth muscle actin promoter |                  |
